# Supplementary material
Source: HighWire-hosted journal article supplement (https://bmjopen.bmj.com/content/8/10/e023208)
Supplement: inline-supplementary-material-1 [file inline-supplementary-material-1.pdf]

## **Supplementary materials**

### **List of content:**

**–Table 1.** PubMed search strategy

**–Table 2.** EMBASE search strategy

**–Table 3.** The Cochrane Library search strategy

**–Table 4.** Ovid search strategy

**–Table 5.** The CINAHL search strategy

**–Fig. 1.** Mean change in 6-minute walk distance (6MWD) (m) after exercise intervention vs. non-exercise treatment after bariatric surgery

**–Table 6.** Summary of synthetic exercise intervention outcomes

**–Table 7.** GRADE analysis: quality assessment and summary of findings

**Table 1.** PubMed search strategy

| Search | Query                                                                                                                                                                                                                                                                                                                                                                                                                                                                                                                                                                                                                                                                                                                                                                                                                                                                                                   | Items found |
|--------|---------------------------------------------------------------------------------------------------------------------------------------------------------------------------------------------------------------------------------------------------------------------------------------------------------------------------------------------------------------------------------------------------------------------------------------------------------------------------------------------------------------------------------------------------------------------------------------------------------------------------------------------------------------------------------------------------------------------------------------------------------------------------------------------------------------------------------------------------------------------------------------------------------|-------------|
| #1     | Search (((((((("Bariatric Surgery"[Mesh]) OR "Gastric Bypass"[Mesh]) OR "Gastroplasty"[Mesh]) OR "Gastroenterostomy"[Mesh]) OR "Gastrectomy"[Mesh]) OR "Biliopancreatic Diversion"[Mesh]) OR "Jejunioileal Bypass"[Mesh]) OR "Anastomosis, Roux-en-Y"[Mesh]) OR (((((((((((bariatric surgical procedure*[Title/Abstract]) OR bariatric surg*[Title/Abstract]) OR metabolic Surg*[Title/Abstract]) OR stomach stapl*[Title/Abstract]) OR weight loss surgery[Title/Abstract]) OR weight reduction surgery[Title/Abstract]) OR obesity surgery[Title/Abstract]) OR Roux-en-Y Gastric Bypass[Title/Abstract]) OR sleeve gastrectomy[Title/Abstract]) OR gastric sleeve[Title/Abstract]) OR gastric banding[Title/Abstract]) OR LAGB[Title/Abstract]) OR LSG[Title/Abstract]) OR bariatric operation[Title/Abstract]) OR duodenal switch[Title/Abstract] OR lap band[Title/Abstract]))) Sort by: Best Match | 61612       |
| #2     | Search (((((((("Exercise"[Mesh]) OR "Exercise Therapy"[Mesh]) OR ("Physical Education and Training"[Mesh])) OR "Exercise Movement Techniques"[Mesh]) OR "Weight Reduction Programs"[Mesh]) OR "Motor Activity"[Mesh]) OR "Resistance Training"[Mesh]) OR (((((((((((exercis*[Title/Abstract]) OR strength train*[Title/Abstract]) OR physical activ*[Title/Abstract]) OR aerobic train*[Title/Abstract]) OR endurance train* [Title/Abstract]) OR Structured exercis*[Title/Abstract]) OR physical exercis*[Title/Abstract]) OR isometric exercis*[Title/Abstract]) OR exercise train*[Title/Abstract]) OR walk*[Title/Abstract]) OR jog*[Title/Abstract]) OR swim*[Title/Abstract]) OR physical train*[Title/Abstract]) )))) Sort by: Best Match                                                                                                                                                       | 564740      |
| #3     | Search (((randomized controlled trial[Publication Type] OR randomized[Title/Abstract] OR placebo[Title/Abstract]))) Sort by: Best Match                                                                                                                                                                                                                                                                                                                                                                                                                                                                                                                                                                                                                                                                                                                                                                 | 777239      |
| #4     | #1 and #2 and #3                                                                                                                                                                                                                                                                                                                                                                                                                                                                                                                                                                                                                                                                                                                                                                                                                                                                                        | <b>175</b>  |

**Table 2.** The Cochrane Library search strategy

| Search | Query                                                                                                                                                                                                               | Items found |
|--------|---------------------------------------------------------------------------------------------------------------------------------------------------------------------------------------------------------------------|-------------|
| #1     | MeSH descriptor: [Bariatric Surgery] explode all trees                                                                                                                                                              | 1106        |
| #2     | MeSH descriptor: [Gastric Bypass] explode all trees                                                                                                                                                                 | 519         |
| #3     | MeSH descriptor: [Gastroplasty] explode all trees                                                                                                                                                                   | 265         |
| #4     | MeSH descriptor: [Jejunioileal Bypass] explode all trees                                                                                                                                                            | 25          |
| #5     | MeSH descriptor: [Gastroenterostomy] explode all trees                                                                                                                                                              | 572         |
| #6     | MeSH descriptor: [Gastrectomy] explode all trees                                                                                                                                                                    | 1026        |
| #7     | MeSH descriptor: [Biliopancreatic Diversion] explode all trees                                                                                                                                                      | 33          |
| #8     | MeSH descriptor: [Anastomosis, Roux-en-Y] explode all trees                                                                                                                                                         | 152         |
| #9     | obes* surg*:ti,ab,kw (Word variations have been searched)                                                                                                                                                           | 2894        |
| #10    | weight loss surg*:ti,ab,kw (Word variations have been searched)                                                                                                                                                     | 2404        |
| #11    | weight reduction surg*:ti,ab,kw (Word variations have been searched)                                                                                                                                                | 1824        |
| #12    | antiobes* surg*:ti,ab,kw (Word variations have been searched)                                                                                                                                                       | 7           |
| #13    | metabolic surg*:ti,ab,kw (Word variations have been searched)                                                                                                                                                       | 1872        |
| #14    | gastric surg*:ti,ab,kw (Word variations have been searched)                                                                                                                                                         | 4613        |
| #15    | bariatric surg*:ti,ab,kw (Word variations have been searched)                                                                                                                                                       | 1413        |
| #16    | bariatric operation*:ti,ab,kw (Word variations have been searched)                                                                                                                                                  | 189         |
| #17    | bariatric procedure*:ti,ab,kw (Word variations have been searched)                                                                                                                                                  | 466         |
| #18    | bariatric post:ti,ab,kw (Word variations have been searched)                                                                                                                                                        | 259         |
| #19    | bariatric patient*:ti,ab,kw (Word variations have been searched)                                                                                                                                                    | 1163        |
| #20    | gastric band*:ti,ab,kw (Word variations have been searched)                                                                                                                                                         | 575         |
| #21    | gastric imbrication*:ti,ab,kw (Word variations have been searched)                                                                                                                                                  | 6           |
| #22    | gastric sleeve:ti,ab,kw (Word variations have been searched)                                                                                                                                                        | 366         |
| #23    | gastric stapl*:ti,ab,kw (Word variations have been searched)                                                                                                                                                        | 165         |
| #24    | gastric resection*:ti,ab,kw (Word variations have been searched)                                                                                                                                                    | 1096        |
| #25    | gastric reduction*:ti,ab,kw (Word variations have been searched)                                                                                                                                                    | 2004        |
| #26    | ("gastroileal" or "jejunoileal" or "biliopancreatic" or "gastric" or "stomach") next "bypass":ti,ab,kw (Word variations have been searched)                                                                         | 1241        |
| #27    | malabsorpti* procedure*:ti,ab,kw (Word variations have been searched)                                                                                                                                               | 102         |
| #28    | malabsorpti* surg*:ti,ab,kw (Word variations have been searched)                                                                                                                                                    | 59          |
| #29    | "lap band":ti,ab,kw (Word variations have been searched)                                                                                                                                                            | 25          |
| #30    | "LAGB":ti,ab,kw (Word variations have been searched)                                                                                                                                                                | 79          |
| #31    | "LSG":ti,ab,kw (Word variations have been searched)                                                                                                                                                                 | 209         |
| #32    | (RYGB* or "roux en y"):ti,ab,kw (Word variations have been searched)                                                                                                                                                | 886         |
| #33    | #1 or #2 or #3 or #4 or #5 or #6 or #7 or #8 or #9 or #10 or #11 or #12 or #13 or #14 or #15 or #16 or #17 or #18 or #19 or #20 or #21 or #22 or #23 or #24 or #25 or #26 or #27 or #28 or #29 or #30 or #31 or #32 | 12371       |
| #34    | MeSH descriptor: [Exercise] explode all trees                                                                                                                                                                       | 21105       |

|     |                                                                                                                                                                         |            |
|-----|-------------------------------------------------------------------------------------------------------------------------------------------------------------------------|------------|
| #35 | MeSH descriptor: [Exercise Therapy] explode all trees                                                                                                                   | 11776      |
| #36 | MeSH descriptor: [Physical Education and Training] explode all trees                                                                                                    | 1561       |
| #37 | MeSH descriptor: [Exercise Movement Techniques] explode all trees                                                                                                       | 1928       |
| #38 | MeSH descriptor: [Weight Reduction Programs] explode all trees                                                                                                          | 495        |
| #39 | MeSH descriptor: [Motor Activity] explode all trees                                                                                                                     | 23129      |
| #40 | exercis*:ti,ab,kw (Word variations have been searched)                                                                                                                  | 64032      |
| #41 | physic* activ*:ti,ab,kw (Word variations have been searched)                                                                                                            | 32142      |
| #42 | physic* fit*:ti,ab,kw (Word variations have been searched)                                                                                                              | 6378       |
| #43 | (walk* or jog* or swim* or "weight lift*"):ti,ab,kw (Word variations have been searched)                                                                                | 18688      |
| #44 | (physic* or strength* or resist* or "circuit" or "weight" or aerob* or "cross" or "endurance" or structur*) near/4 train*:ti,ab,kw (Word variations have been searched) | 15644      |
| #45 | #34 or #35 or #36 or #37 or #38 or #39 or #40 or #41 or #42 or #43 or #44                                                                                               | 97240      |
| #46 | #33 and #45                                                                                                                                                             | <b>675</b> |

**Table 3.** EMBASE search strategy

| Search | Query                                                                                                                                         | Items found |
|--------|-----------------------------------------------------------------------------------------------------------------------------------------------|-------------|
| #1     | 'bariatric surgery'/exp                                                                                                                       | 33,837      |
| #2     | 'gastric band'/exp                                                                                                                            | 1,045       |
| #3     | 'gastric banding'/exp                                                                                                                         | 6,634       |
| #4     | 'sleeve gastrectomy'/exp                                                                                                                      | 9,514       |
| #5     | 'laparoscopic sleeve gastrectomy'/exp                                                                                                         | 1,641       |
| #6     | 'biliopancreatic bypass'/exp                                                                                                                  | 2,856       |
| #7     | 'gastrectomy'/exp                                                                                                                             | 54,363      |
| #8     | 'gastric bypass surgery'/'                                                                                                                    | 19,189      |
| #9     | 'roux y anastomosis'/exp                                                                                                                      | 11,309      |
| #10    | 'gastroenterostomy'/exp                                                                                                                       | 2,981       |
| #11    | 'obes* surg*':ab,ti                                                                                                                           | 1,601       |
| #12    | 'weight loss surg*':ab,ti                                                                                                                     | 1,243       |
| #13    | 'weight reduction surg*':ab,ti                                                                                                                | 126         |
| #14    | 'antiobes* surg*':ab,ti                                                                                                                       | 23          |
| #15    | 'metabolic surg*':ab,ti                                                                                                                       | 1,090       |
| #16    | 'gastric surg*':ab,ti                                                                                                                         | 2,709       |
| #17    | 'bariatric operation*':ab,ti                                                                                                                  | 1,097       |
| #18    | 'bariatric surg*':ab,ti                                                                                                                       | 23,030      |
| #19    | 'bariatric procedure*':ab,ti                                                                                                                  | 3,876       |
| #20    | 'gastric band*':ab, 6,378                                                                                                                     | 6,378       |
| #21    | 'gastric imbrication*':ab,ti                                                                                                                  | 11          |
| #22    | 'gastric sleeve':ab,ti                                                                                                                        | 597         |
| #23    | 'gastric stapl*':ab,ti                                                                                                                        | 189         |
| #24    | 'gastric resection*':ab,ti                                                                                                                    | 4,746       |
| #25    | 'gastric reduction*':ab,ti                                                                                                                    | 100         |
| #26    | 'jejunoileal bypass':ab,ti                                                                                                                    | 924         |
| #27    | 'biliopancreatic bypass':ab,ti                                                                                                                | 61          |
| #28    | 'gastric bypass':ab,ti                                                                                                                        | 17,282      |
| #29    | 'stomach bypass':ab,ti                                                                                                                        | 11          |
| #30    | 'malabsorpti* procedure':ab,ti                                                                                                                | 93          |
| #31    | 'malabsorpti* surg*':ab,ti                                                                                                                    | 79          |
| #32    | 'lap band':ab,ti                                                                                                                              | 484         |
| #33    | lagb:ab,ti                                                                                                                                    | 2,109       |
| #34    | lsg:ab,ti                                                                                                                                     | 3,657       |
| #35    | rygb*:ab,ti OR 'roux en y':ab,ti                                                                                                              | 16,052      |
| #36    | #1 OR #2 OR #3 OR #4 OR #5 OR #6 OR #7 OR #8 OR #9 OR #10 OR #11 OR #12 OR #13 OR #14 OR #15 OR #16 OR #17 OR #18 OR #19 OR #20 OR #21 OR #22 | 99,496      |

|     |                                                                                                                               |            |
|-----|-------------------------------------------------------------------------------------------------------------------------------|------------|
|     | OR #23 OR #24 OR #25 OR #26 OR #27 OR #28 OR #29 OR #30 OR #31 OR #32<br>OR #33 OR #34 OR #35                                 |            |
| #37 | 'exercise'/exp                                                                                                                | 298,429    |
| #38 | 'aerobic exercise'/exp                                                                                                        | 12,300     |
| #39 | 'physical activity'/exp                                                                                                       | 346,284    |
| #40 | 'training'/exp                                                                                                                | 77,500     |
| #41 | 'physical education'/exp                                                                                                      | 12,317     |
| #42 | exercis*:ab,ti                                                                                                                | 340,838    |
| #43 | 'physic* activ*':ab,ti                                                                                                        | 125,608    |
| #44 | 'physic* fit*':ab,ti                                                                                                          | 10,662     |
| #45 | walk*:ab,ti OR jog*:ab,ti OR swim*:ab,ti OR 'weight lift*':ab,ti                                                              | 179,538    |
| #46 | #46. 'physic* train*':ab,ti                                                                                                   | 9,793      |
| #47 | 'strength* train*':ab,ti                                                                                                      | 5,472      |
| #48 | 'resist* train*':ab,ti                                                                                                        | 7,623      |
| #49 | 'circuit train*':ab,ti                                                                                                        | 286        |
| #50 | 'weight train*':ab,ti                                                                                                         | 1,165      |
| #51 | 'aerob* train*':ab,ti                                                                                                         | 3,136      |
| #52 | 'cross train*':ab,ti                                                                                                          | 622        |
| #53 | 'endurance train*':ab,ti                                                                                                      | 6,726      |
| #54 | 'structur* train*':ab,ti                                                                                                      | 1,106      |
| #55 | #37 OR #38 OR #39 OR #40 OR #41 OR #42 OR #43 OR #44 OR #45 OR #46 OR #47<br>OR #48 OR #49 OR #50 OR #51 OR #52 OR #53 OR #54 | 892,693    |
| #56 | 'randomized controlled trial'/exp                                                                                             | 498,272    |
| #57 | #36 AND #55 AND #56                                                                                                           | <b>142</b> |

**Table 4.** Ovid search strategy

| Search | Query                                                                                                                                                                               | Items found |
|--------|-------------------------------------------------------------------------------------------------------------------------------------------------------------------------------------|-------------|
| 1.     | exp Bariatric Surgery/                                                                                                                                                              | 21485       |
| 2.     | exp Biliopancreatic Diversion/                                                                                                                                                      | 921         |
| 3.     | exp Gastric Bypass/                                                                                                                                                                 | 7858        |
| 4.     | exp GASTROENTEROSTOMY/                                                                                                                                                              | 11162       |
| 5.     | exp Gastrectomy/                                                                                                                                                                    | 32297       |
| 6.     | exp Anastomosis, Roux-en-Y/                                                                                                                                                         | 3263        |
| 7.     | "obes* surg*".ab,ti.                                                                                                                                                                | 969         |
| 8.     | "weight loss surg*".ab,ti.                                                                                                                                                          | 733         |
| 9.     | "weight reduction surg*".ab,ti.                                                                                                                                                     | 95          |
| 10.    | "antiobes* surg*".ab,ti.                                                                                                                                                            | 22          |
| 11.    | "metabolic surg*".ab,ti.                                                                                                                                                            | 541         |
| 12.    | "gastric surg*".ab,ti.                                                                                                                                                              | 2073        |
| 13.    | "bariatric operation*".ab,ti.                                                                                                                                                       | 616         |
| 14.    | "bariatric surg*".ab,ti.                                                                                                                                                            | 12690       |
| 15.    | "bariatric procedure*".ab,ti.                                                                                                                                                       | 1759        |
| 16.    | "gastric band*".ab,ti.                                                                                                                                                              | 3457        |
| 17.    | "gastric imbrication*".ab,ti.                                                                                                                                                       | 4           |
| 18.    | "gastric sleeve".ab,ti.                                                                                                                                                             | 162         |
| 19.    | "gastric stapl*".ab,ti.                                                                                                                                                             | 123         |
| 20.    | "gastric resection*".ab,ti.                                                                                                                                                         | 3794        |
| 21.    | "gastric reduction*".ab,ti.                                                                                                                                                         | 73          |
| 22.    | "jejunoileal bypass".ab,ti.                                                                                                                                                         | 810         |
| 23.    | "biliopancreatic bypass".ab,ti.                                                                                                                                                     | 58          |
| 24.    | "gastric bypass".ab,ti.                                                                                                                                                             | 9330        |
| 25.    | "stomach bypass".ab,ti.                                                                                                                                                             | 14          |
| 26.    | "malabsorpti* procedure".ab,ti.                                                                                                                                                     | 44          |
| 27.    | "malabsorpti* surg*".ab,ti.                                                                                                                                                         | 41          |
| 28.    | "lap band".ab,ti.                                                                                                                                                                   | 247         |
| 29.    | "LAGB".ab,ti.                                                                                                                                                                       | 1034        |
| 30.    | "LSG".ab,ti.                                                                                                                                                                        | 1544        |
| 31.    | "rygb*".ab,ti.                                                                                                                                                                      | 2580        |
| 32.    | "roux en y".ab,ti.                                                                                                                                                                  | 9209        |
| 33.    | 1 or 2 or 3 or 4 or 5 or 6 or 7 or 8 or 9 or 10 or 11 or 12 or 13 or 14 or 15 or 16 or 17 or 18 or 19 or 20 or 21 or 22 or 23 or 24 or 25 or 26 or 27 or 28 or 29 or 30 or 31 or 32 | 66935       |
| 34.    | exp EXERCISE/                                                                                                                                                                       | 166772      |
| 35.    | exp "Physical Education and Training"/                                                                                                                                              | 13053       |
| 36.    | exp RESISTANCE TRAINING/                                                                                                                                                            | 6494        |

|     |                                                                                                                |            |
|-----|----------------------------------------------------------------------------------------------------------------|------------|
| 37. | "exercis*".ab,ti.                                                                                              | 258920     |
| 38. | "physic* activ*".ab,ti.                                                                                        | 94979      |
| 39. | "physic* fit*".ab,ti.                                                                                          | 8419       |
| 40. | "weight lift*".ab,ti.                                                                                          | 1179       |
| 41. | "walk*".ab,ti.                                                                                                 | 100469     |
| 42. | "jog*".ab,ti.                                                                                                  | 2124       |
| 43. | "swim*".ab,ti.                                                                                                 | 35212      |
| 44. | "physic* train*".ab,ti.                                                                                        | 7154       |
| 45. | "strength* train*".ab,ti.                                                                                      | 4412       |
| 46. | "resist* train*".ab,ti.                                                                                        | 6565       |
| 47. | "circuit train*".ab,ti.                                                                                        | 210        |
| 48. | "weight train*".ab,ti.                                                                                         | 1020       |
| 49. | "aerob* train*".ab,ti.                                                                                         | 2202       |
| 50. | "cross train*".ab,ti.                                                                                          | 490        |
| 51. | "endurance train*".ab,ti.                                                                                      | 5433       |
| 52. | "structur* train*".ab,ti.                                                                                      | 728        |
| 53. | 34 or 35 or 36 or 37 or 38 or 39 or 40 or 41 or 42 or 43 or 44 or 45 or 46 or 47 or 48 or 49 or 50 or 51 or 52 | 498208     |
| 54. | randomized controlled trial.pt. or randomized.mp. or placebo.mp.                                               | 803734     |
| 55. | 33 and 53 and 54                                                                                               | <b>165</b> |



**Table 5.** The CINAHL search strategy

| Search | Query                                                                                                                                                                                                                                                              | Items found |
|--------|--------------------------------------------------------------------------------------------------------------------------------------------------------------------------------------------------------------------------------------------------------------------|-------------|
| S1     | (MH "Bariatric Surgery+")                                                                                                                                                                                                                                          | 6,252       |
| S2     | (MH "Bariatric Patients")                                                                                                                                                                                                                                          | 249         |
| S3     | (MM "Gastroenterostomy+")                                                                                                                                                                                                                                          | 1,502       |
| S4     | TI "bariatric surg*" OR AB "bariatric surg*" OR TI "metabolic surg*" OR AB "metabolic surg*" OR TI "antiobesity surg*" OR AB "antiobesity surg*" OR TI "weight loss surg*" OR AB "weight loss surg*" OR TI "weight reduction surg*" OR AB "weight reduction surg"  | 1,128       |
| S5     | TI "gastric band*" OR AB "gastric band*" OR TI "gastric bypass" OR AB "gastric bypass" OR TI "gastric surg*" OR AB "gastric surg*" OR TI "gastric imbrication*" OR AB "gastric imbrication*" OR TI "gastric sleeve" OR AB "gastric sleeve"                         | 940         |
| S6     | TI "gastroileal bypass" OR AB "gastroileal bypass" OR TI gastrojejunostom* OR AB gastrojejunostom* OR TI "sleeve gastrectom*" OR AB "sleeve gastrectom*" OR TI gastroplast* OR AB gastroplast* OR TI "biliopancreatic diversion" OR AB "biliopancreatic diversion" | 526         |
| S7     | TI "biliopancreatic bypass" OR AB "biliopancreatic bypass" OR TI "malabsorpti* procedure*" OR AB "malabsorpti* procedure*" OR TI "malabsorpti* surg*" OR AB "malabsorpti* surg*" OR TI "lap band" OR AB "lap band" OR TI LAGB OR AB LAGB                           | 98          |
| S8     | TI LSG OR AB LSG OR TI RYGB* OR AB RYGB* OR TI "roux en y" OR AB "roux en y"                                                                                                                                                                                       | 651         |
| S9     | S1 OR S2 OR S3 OR S4 OR S5 OR S6 OR S7 OR S8                                                                                                                                                                                                                       | 2,694       |
| S10    | (MH "Exercise+")                                                                                                                                                                                                                                                   | 89,602      |
| S11    | (MH "Therapeutic Exercise+")                                                                                                                                                                                                                                       | 43,740      |
| S12    | (MH "Resistance Training")                                                                                                                                                                                                                                         | 3,043       |
| S13    | (MH "Physical Education and Training+")                                                                                                                                                                                                                            | 2,723       |
| S14    | (MH "Physical Education and Training+")                                                                                                                                                                                                                            | 2,723       |
| S15    | (MH "Physical Activity")                                                                                                                                                                                                                                           | 29,923      |
| S16    | (MH "Motor Activity+")                                                                                                                                                                                                                                             | 10,572      |
| S17    | TI exercis* OR AB exercis* OR TI "physic* activ*" OR AB "physic* activ*" OR TI "physic* fit*" OR AB "physic* fit"                                                                                                                                                  | 35,795      |
| S18    | S10 OR S11 OR S12 OR S13 OR S14 OR S15 OR S16 OR S17                                                                                                                                                                                                               | 52,391      |
| S19    | (MH "Prognosis+")                                                                                                                                                                                                                                                  | 330,298     |
| S20    | (MH "Study Design+")                                                                                                                                                                                                                                               | 1,051,786   |
| S21    | TX random*                                                                                                                                                                                                                                                         | 245,160     |
| S22    | S19 OR S20 OR S21                                                                                                                                                                                                                                                  | 532,048     |
| S23    | S9 AND S18 AND S22                                                                                                                                                                                                                                                 | <b>71</b>   |

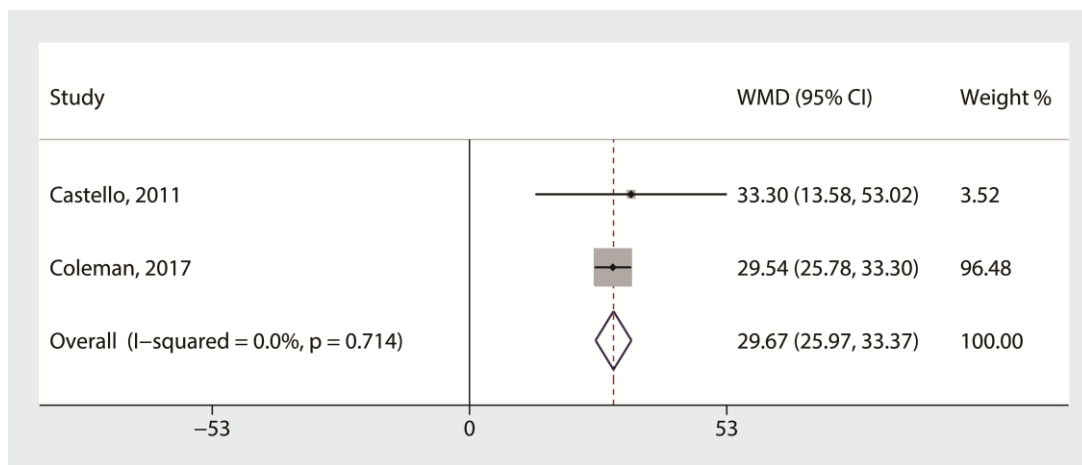

**Fig. 1.** Mean change in 6-minute walk distance (6MWD) (m) after exercise intervention vs. non-exercise treatment after bariatric surgery.

**Table 6.** Summary of synthetic exercise intervention outcomes

| Outcome             | Mean Difference [95% CI] | P-value  | I <sup>2</sup> (%) |
|---------------------|--------------------------|----------|--------------------|
| Body weight         | −1.94 [−3.18, −0.69]     | 0.002    | 51.0               |
| BMI                 | −0.40 [−0.81, 0.00]      | 0.05     | 44.0               |
| BF%                 | −1.93 [−4.06, 0.20]      | 0.08     | 92.8               |
| FM                  | −3.35 [−7.99, 1.29]      | 0.16     | 94.8               |
| FFM                 | 0.53 [−1.88, 2.94]       | 0.67     | 71.0               |
| Waist circumference | −5.25 [−10.48, −0.03]    | 0.05     | 93.5               |
| Hip circumference   | −3.91 [−11.09, 3.26]     | 0.28     | 87.5               |
| 6MWD                | 29.67 [25.97, 33.37]     | <0.00001 | 0.0                |
| SBP                 | −4.12 [−6.68, −1.55]     | 0.002    | 6.0                |
| DBP                 | −3.56 [−8.61, 1.48]      | 0.17     | 83.0               |
| HR                  | −4.39 [−8.11, −0.68]     | 0.02     | 0.0                |

Note: BMI = body mass index; BF% = percentage of total body fat; FM = fat mass; FFM = fat free mass; 6MWD = 6-minute walk distance; SBP = systolic blood pressure, DBP = diastolic blood pressure; HR = heart rate.

–Table 7. GRADE analysis: quality assessment and summary of findings

| Physical exercise compared to no exercise for patients following bariatric surgery |                                          |                                                                                                  |                             |                                 |                                      |          |
|------------------------------------------------------------------------------------|------------------------------------------|--------------------------------------------------------------------------------------------------|-----------------------------|---------------------------------|--------------------------------------|----------|
| <b>Patient or population:</b> patients following bariatric surgery                 |                                          |                                                                                                  |                             |                                 |                                      |          |
| <b>Settings:</b> hospital / at home                                                |                                          |                                                                                                  |                             |                                 |                                      |          |
| <b>Intervention:</b> Physical exercise                                             |                                          |                                                                                                  |                             |                                 |                                      |          |
| <b>Comparison:</b> no exercise                                                     |                                          |                                                                                                  |                             |                                 |                                      |          |
| Outcomes                                                                           | Illustrative comparative risks* (95% CI) |                                                                                                  | Relative effect<br>(95% CI) | No of Participants<br>(studies) | Quality of the evidence<br>(GRADE)   | Comments |
|                                                                                    | Assumed risk                             | Corresponding risk                                                                               |                             |                                 |                                      |          |
|                                                                                    | No exercise                              | Physical exercise                                                                                |                             |                                 |                                      |          |
| <b>Body weight</b><br>Follow-up: 3-18 months                                       |                                          | The mean body weight in the intervention groups was<br><b>1.94 lower</b><br>(3.18 to 0.69 lower) |                             | 347<br>(8 studies)              | □□□□<br><b>moderate</b> <sup>1</sup> |          |
| <b>BMI</b><br>Follow-up: 3-18 months                                               |                                          | The mean bmi in the intervention groups was<br><b>0.40 lower</b><br>(0.81 lower to 0 higher)     |                             | 259<br>(5 studies)              | □□□□<br><b>moderate</b> <sup>1</sup> |          |

|                                                   |  |                                                                                                                |                    |                                            |
|---------------------------------------------------|--|----------------------------------------------------------------------------------------------------------------|--------------------|--------------------------------------------|
| <b>Body fat%</b><br>Follow-up: 3-6 months         |  | The mean body fat% in the intervention groups was<br><b>1.93 lower</b><br>(4.06 lower to 0.2 higher)           | 107<br>(4 studies) | □□□□<br><b>low</b> <sup>1,2</sup>          |
| <b>Fat mass</b><br>Follow-up: 3-12 months         |  | The mean fat mass in the intervention groups was<br><b>3.35 lower</b><br>(7.99 lower to 1.29 higher)           | 186<br>(3 studies) | □□□□<br><b>low</b> <sup>1,2,3</sup>        |
| <b>Fat free mass</b><br>Follow-up: 3-6 months     |  | The mean fat free mass in the intervention groups was<br><b>0.53 higher</b><br>(1.88 lower to 2.94 higher)     | 58<br>(2 studies)  | □□□□<br><b>very low</b> <sup>1,2,3,4</sup> |
| <b>Waist circumference</b><br>Follow-up: 3-6 days |  | The mean waist circumference in the intervention groups was<br><b>5.25 lower</b><br>(10.48 to 0.03 lower)      | 198<br>(4 studies) | □□□□<br><b>low</b> <sup>1,2,3</sup>        |
| <b>Hip circumference</b><br>Follow-up: 3-6 months |  | The mean hip circumference in the intervention groups was<br><b>3.91 lower</b><br>(11.09 lower to 3.26 higher) | 70<br>(3 studies)  | □□□□<br><b>very low</b> <sup>1,2,3,4</sup> |
| <b>6MWD</b><br>Follow-up: 3-12 months             |  | The mean 6mwd in the intervention groups was<br><b>29.67 higher</b><br>(25.97 to 33.37 higher)                 | 65<br>(2 studies)  | □□□□<br><b>low</b> <sup>1,2</sup>          |

|                                                           |  |                                                                                                                      |                    |                                              |
|-----------------------------------------------------------|--|----------------------------------------------------------------------------------------------------------------------|--------------------|----------------------------------------------|
| <b>Systolic blood pressure</b><br>Follow-up: 3-18 months  |  | The mean systolic blood pressure in the intervention groups was<br><b>4.12 lower</b><br>(6.68 to 1.55 lower)         | 229<br>(4 studies) | □□□□<br><b>low</b> <sup>1,3</sup>            |
| <b>Diastolic blood pressure</b><br>Follow-up: 3-18 months |  | The mean diastolic blood pressure in the intervention groups was<br><b>3.56 lower</b><br>(8.61 lower to 1.48 higher) | 229<br>(4 studies) | □□□□<br><b>very low</b> <sup>1,2,3,4,5</sup> |
| <b>Resting heart rate</b><br>Follow-up: 3-18 months       |  | The mean resting heart rate in the intervention groups was<br><b>4.39 lower</b><br>(8.11 to 0.68 lower)              | 94<br>(3 studies)  | □□□□<br><b>low</b> <sup>1,3,5</sup>          |

\*The basis for the **assumed risk** (e.g. the median control group risk across studies) is provided in footnotes. The **corresponding risk** (and its 95% confidence interval) is based on the assumed risk in the comparison group and the **relative effect** of the intervention (and its 95% CI).

**CI:** Confidence interval;

GRADE Working Group grades of evidence

**High quality:** Further research is very unlikely to change our confidence in the estimate of effect.

**Moderate quality:** Further research is likely to have an important impact on our confidence in the estimate of effect and may change the estimate.

**Low quality:** Further research is very likely to have an important impact on our confidence in the estimate of effect and is likely to change the estimate.

**Very low quality:** We are very uncertain about the estimate.

1. Total sample size is less than 400
2. The significant heterogeneity with a large  $I^2$  value
3. The 95% CI around the pooled effect is wide
4. The included trial had high risk of performance bias for not blinding the participants

---

5. Due to high risk of publication bias

---
